# Supplementary material for: Biographical Approach to Patients Consulting for Presumed Lyme Disease: A Contribution to the Understanding of Patient Pathways in Symptom-Based Diseases
Source: Preprints.org preprint supplement (doi:10.20944/preprints202205.0350.v1), 2022-05-25
Supplement: Supplementary file 1 [file supplementary]

*Article*

# **Biographical Approach to Patients Consulting for Presumed Lyme Disease: a contribution to the understanding of patient pathways in symptom-based diseases.**

**Authors: Romain Lutaud<sup>\*1,2,3</sup>, Pierre Verger<sup>3</sup>, Patrick Peretti-Watel<sup>4</sup>, Carole Eldin<sup>5</sup>.**

## Appendices/ Supplementary Materials

This supplementary material has been provided by the authors to give readers additional information about their work.

### COREQ (Consolidated criteria for REporting Qualitative research) Checklist

A checklist of items that should be included in reports of qualitative research. You must report the page number in your manuscript where you consider each of the items listed in this checklist. If you have not included this information, either revise your manuscript accordingly before submitting or note N/A.

| Topic                                          | Item No. | Guide Questions/Description                                                                                                                              | Reported on Page No. |
|------------------------------------------------|----------|----------------------------------------------------------------------------------------------------------------------------------------------------------|----------------------|
| <b>Domain 1: Research team and reflexivity</b> |          |                                                                                                                                                          |                      |
| <i>Personal characteristics</i>                |          |                                                                                                                                                          |                      |
| Interviewer/facilitator                        | 1        | Which author/s conducted the interview or focus group?                                                                                                   | 8                    |
| Credentials                                    | 2        | What were the researcher's credentials? E.g. PhD, MD                                                                                                     | 8                    |
| Occupation                                     | 3        | What was their occupation at the time of the study?                                                                                                      | 8                    |
| Gender                                         | 4        | Was the researcher male or female?                                                                                                                       | 8                    |
| Experience and training                        | 5        | What experience or training did the researcher have?                                                                                                     | 8                    |
| <i>Relationship with participants</i>          |          |                                                                                                                                                          |                      |
| Relationship established                       | 6        | Was a relationship established prior to study commencement?                                                                                              | 8                    |
| Participant knowledge of the interviewer       | 7        | What did the participants know about the researcher? e.g. personal goals, reasons for doing the research                                                 | Supplements          |
| Interviewer characteristics                    | 8        | What characteristics were reported about the interviewer/facilitator? e.g. Bias, assumptions, reasons and interests in the research topic                | N/A                  |
| <b>Domain 2: Study design</b>                  |          |                                                                                                                                                          |                      |
| <i>Theoretical framework</i>                   |          |                                                                                                                                                          |                      |
| Methodological orientation and Theory          | 9        | What methodological orientation was stated to underpin the study? e.g. grounded theory, discourse analysis, ethnography, phenomenology, content analysis | 7-8                  |
| <i>Participant selection</i>                   |          |                                                                                                                                                          |                      |
| Sampling                                       | 10       | How were participants selected? e.g. purposive, convenience, consecutive, snowball                                                                       | 7                    |
| Method of approach                             | 11       | How were participants approached? e.g. face-to-face, telephone, mail, email                                                                              | 7                    |
| Sample size                                    | 12       | How many participants were in the study?                                                                                                                 | 7                    |
| Non-participation                              | 13       | How many people refused to participate or dropped out? Reasons?                                                                                          | N/A                  |
| <i>Setting</i>                                 |          |                                                                                                                                                          |                      |
| Setting of data collection                     | 14       | Where was the data collected? e.g. home, clinic, workplace                                                                                               | 8                    |
| Presence of non-participants                   | 15       | Was anyone else present besides the participants and researchers?                                                                                        | 8                    |
| Description of sample                          | 16       | What are the important characteristics of the sample? e.g. demographic data, date                                                                        | 9                    |
| <i>Data collection</i>                         |          |                                                                                                                                                          |                      |
| Interview guide                                | 17       | Were questions, prompts, guides provided by the authors? Was it pilot tested?                                                                            | 7                    |
| Repeat interviews                              | 18       | Were repeat interviews carried out? If yes, how many?                                                                                                    | 6                    |
| Audio/visual recording                         | 19       | Did the research use audio or visual recording to collect the data?                                                                                      | 8                    |
| Field notes                                    | 20       | Were field notes made during and/or after the interview or focus group?                                                                                  | 8                    |
| Duration                                       | 21       | What was the duration of the interviews or focus group?                                                                                                  | 8                    |
| Data saturation                                | 22       | Was data saturation discussed?                                                                                                                           | N/A                  |
| Transcripts returned                           | 23       | Were transcripts returned to participants for comment and/or                                                                                             | N/A                  |

| Topic                                  | Item No. | Guide Questions/Description                                                                                                        | Reported on Page No. |
|----------------------------------------|----------|------------------------------------------------------------------------------------------------------------------------------------|----------------------|
|                                        |          | correction?                                                                                                                        |                      |
| <b>Domain 3: analysis and findings</b> |          |                                                                                                                                    |                      |
| <i>Data analysis</i>                   |          |                                                                                                                                    |                      |
| Number of data coders                  | 24       | How many data coders coded the data?                                                                                               | 8                    |
| Description of the coding tree         | 25       | Did authors provide a description of the coding tree?                                                                              | 8/9                  |
| Derivation of themes                   | 26       | Were themes identified in advance or derived from the data?                                                                        | 8                    |
| Software                               | 27       | What software, if applicable, was used to manage the data?                                                                         | 8                    |
| Participant checking                   | 28       | Did participants provide feedback on the findings?                                                                                 | N/A                  |
| <i>Reporting</i>                       |          |                                                                                                                                    |                      |
| Quotations presented                   | 29       | Were participant quotations presented to illustrate the themes/findings?<br>Was each quotation identified? e.g. participant number | N/A                  |
| Data and findings consistent           | 30       | Was there consistency between the data presented and the findings?                                                                 | 9-10-11              |
| Clarity of major themes                | 31       | Were major themes clearly presented in the findings?                                                                               | 9-10-11              |
| Clarity of minor themes                | 32       | Is there a description of diverse cases or discussion of minor themes?                                                             | 9-10-11              |

Developed from: Tong A, Sainsbury P, Craig J. Consolidated criteria for reporting qualitative research (COREQ): a 32-item checklist for interviews and focus groups. *International Journal for Quality in Health Care*. 2007. Volume 19, Number 6: pp. 349 – 357

**Once you have completed this checklist, please save a copy and upload it as part of your submission. DO NOT include this checklist as part of the main manuscript document. It must be uploaded as a separate file.**

## **Figure A2. Interview Guide**

We are interested in knowing your care history, particularly the history of diagnoses related to the symptoms that led you to consult at the IHU but also how you experienced this journey, and the role of the doctors who accompanied you. There is no right or wrong answer. Please do not feel like you have to answer in a certain way. The questions are also NOT specific about you, meaning all questions are hypothetical.

Do you have any questions before to start?

### **Clinical history and impact**

- 1) What do you do in life? (career, family, education)
- 2) Symptom onset, clinical history / specific dates
- 3) if you had to prioritize symptoms in the way they most impact your daily life What would be the first? the following in the order?  
What impact have these symptoms had on your professional life? your entourage? are you currently on sick leave?
- 4) Are there any particular life events that you would like to talk about that may have had an impact on your symptoms?
- 5) If you had to prioritize the probable diagnoses that best explain all of your symptoms, which would you place first? which ones would you place next?
- 6) For this diagnosis that you placed first: how confident/certainty do you have in your answer? low (I am not sure)/ medium (50-50%), high (I am convinced)
- 7) For what reasons do you think of this diagnosis mentioned first? (let speak freely ++)

### **Genesis of the Lyme Hypothesis**

- 1) Have you been exposed or even bitten by a tick? If so, can you tell us about the treatment/diagnosis that took place? Erythema Migrans?
- 2) When did you first hear about Lyme disease?
- 3) In what situations do you think you have been possibly exposed to the disease?
- 3) Under what circumstances has the hypothesis of Lyme disease been raised to explain your health problems? Who first brought it up or thought of it? (let the person speak freely if it comes up spontaneously)
- 4) Do you have an attending physician, or specialist doctor who regularly follows you for these symptoms? Have you discussed it with him/her? What did your doctor think about it? Has he or she encouraged you in this diagnostic process?
- 5) Have you used a Lyme diagnostic questionnaire on the internet? What was the result?
- 6) Did you do the serology? at the request of the doctor?
- 7) In which laboratory did you perform it? What was the result?
- 8) Have you received prolonged antibiotic therapy for chronic Lyme? Who prescribed it to you? Have you felt any improvement?

### **Care pathway**

- 1) Let's go back over the history of the symptoms, can you give a precise account (chronology) of the doctors you have used in this context?
- 2) Who referred you to the IHU?
- 3) Did you consult a psychiatrist, for example? pain-centre?
- 4) Have you been hospitalized for these health problems?
- 5) Can we list all the diagnoses that have been mentioned by the doctors?
- 6) Did you have recourse to alternative medicine?  
(to be explained)

7) Finally, have you met with professionals who are "specialists" in Lyme disease?

8) Do you regularly visit forums dedicated to Lyme disease? or are you a member of a patient association?

9) Generally speaking, have you felt that your doctors have listened enough to you about these health problems? How would you characterize the relationship with your GP?

**In conclusion**, is there anything else I haven't asked you about this topic that you would like to share?

Figure A3. Life calendar (image)

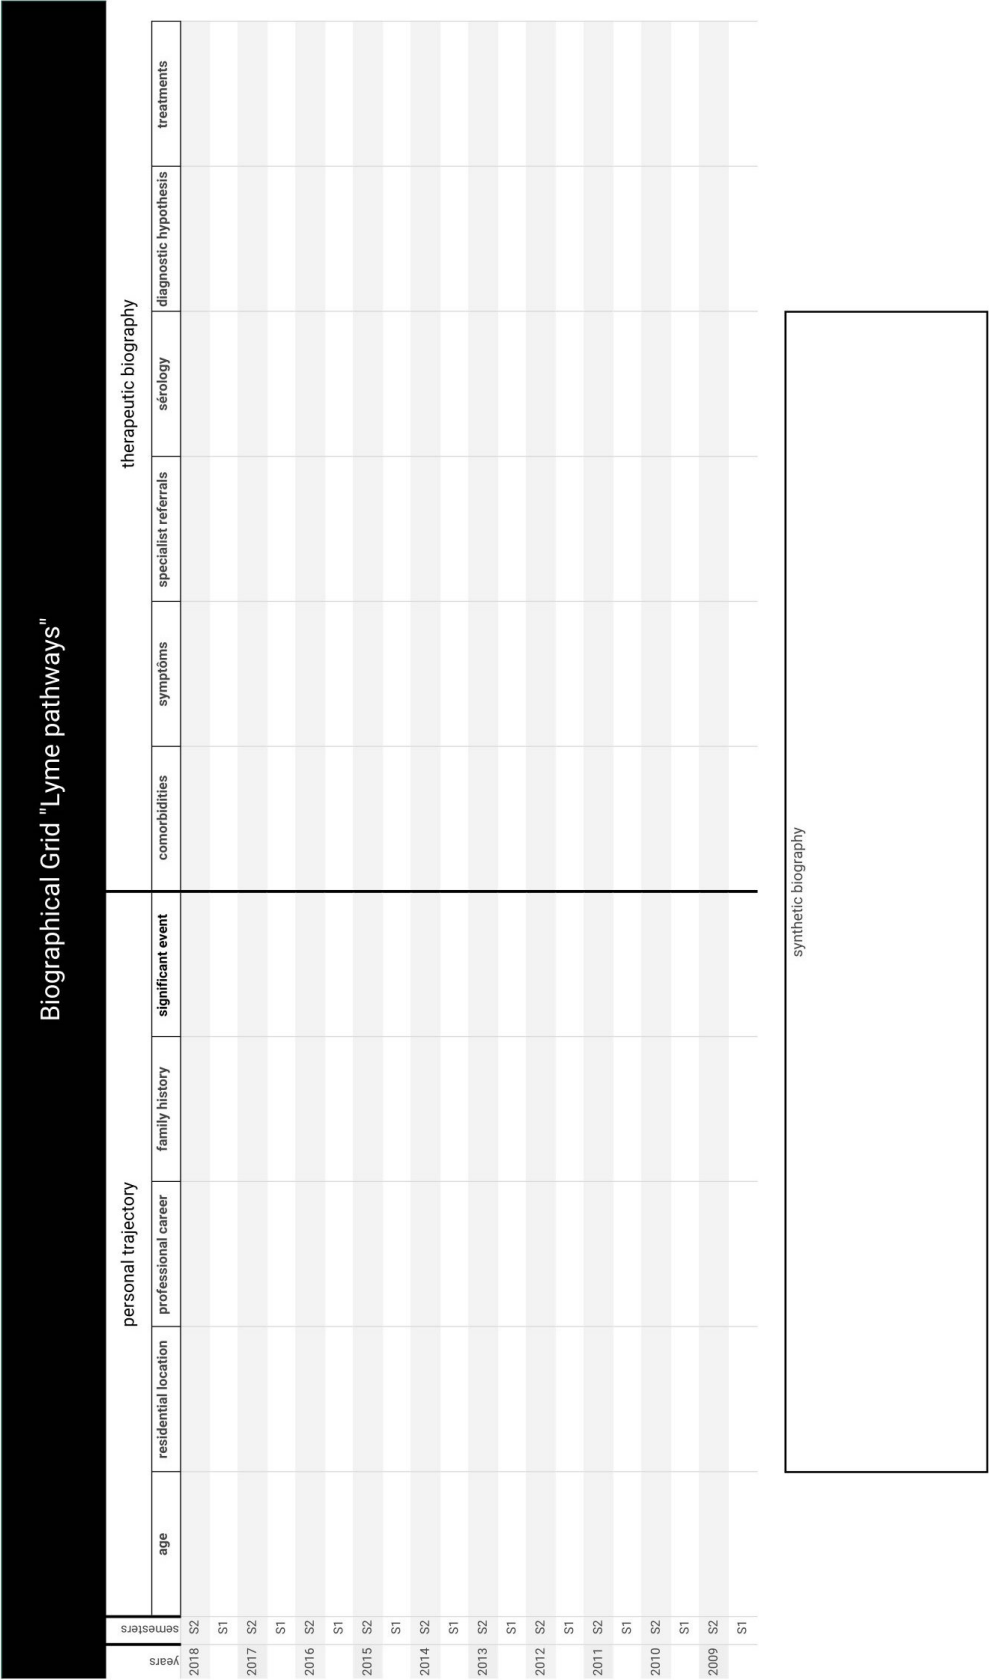



**Table A1. Social characteristics**

| Characteristic                    | No.  |
|-----------------------------------|------|
| Age, mean (SD), y                 | 47.3 |
| Female sex                        | 25   |
| Living in a couple                | 23   |
| Educational level                 |      |
| <Secondary school education       | 7    |
| Secondary school education        | 6    |
| ≥ Tertiary education              | 17   |
| Professional situation            |      |
| Active employment                 | 22   |
| Unemployed                        | 3    |
| Retired                           | 4    |
| Disability                        | 1    |
| Currently on sick leave           | 17   |
| Geographical origin <sup>a</sup>  |      |
| <i>Provence-Alpes Côte d'Azur</i> | 28   |

**Table A2. Clinical characteristics of the 30 patients**

| Clinical profile <sup>a</sup>                 | No           |
|-----------------------------------------------|--------------|
| Chronic pain <sup>b</sup>                     | 15           |
| Neurological symptoms <sup>c</sup>            | 8            |
| Chronic fatigue syndrome <sup>d</sup>         | 7            |
| Average duration of symptoms [min-max], y     | 8.5 [0.5-54] |
| Had an average duration of symptoms ≥ 5 years | 15           |

<sup>a</sup> The clinical profile was defined according to patient's prioritisation of symptoms, in decreasing order of their impact on their quality of life.

<sup>b</sup> The "chronic pain" category included neuropathic, musculo-articular, diffuse, poorly characterised or head-ache-type pain.

<sup>c</sup> The "neurological profile" category included patients whose main complaint was vertigo or sensitive motor disorders or cognitive complaints.

<sup>d</sup> The "chronic fatigue syndrome" category included patients with predominant fatigue, often associated with concentration difficulties.

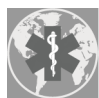

**Supplement 3. Genesis of the Lyme Disease diagnostic hypothesis for the 30 participants**

1

| Characteristic features                                                                | N=30 |
|----------------------------------------------------------------------------------------|------|
| <b>Reported tick bite</b>                                                              | 8    |
| <b>Nature of exposure from the patient's perspective<br/>(other than a tick bite )</b> | 22   |
| Observed presence of ticks in their environment                                        | 6    |
| History of unidentified insects bites                                                  | 4    |
| Contact with traditionally tick-carrying animals                                       | 5    |
| Tick-bite episode in the entourage                                                     | 2    |
| Endemic region                                                                         | 5    |
| <b>Confirmed history of erythema migrans</b>                                           | 3    |
| <b>Origin of the "chronic Lyme" hypothesis</b>                                         |      |
| Identification with clinical narratives (TV, media, internet)                          | 14   |
| Physician                                                                              | 5    |
| Entourage                                                                              | 5    |
| Medical check-up                                                                       | 6    |
| <b>Lyme serology performed in private laboratories</b>                                 | 30   |
| <b>Results of Lyme serology test</b>                                                   |      |
| negative                                                                               | 16   |
| false-positive <sup>a</sup>                                                            | 14   |
| <b>Serology performed in a non-approved laboratory</b>                                 | 8    |
| <b>Internet diagnostic self-questionnaire</b>                                          | 15   |
| <b>Received "anti-chronic Lyme disease" antibiotic treatment</b>                       | 14   |
| <b>Pro-Lyme caregiver intervention during their diagnostic pathway</b>                 | 8    |
| Including medical doctors                                                              | 6    |

|                                                                                                |    |    |
|------------------------------------------------------------------------------------------------|----|----|
| <b>Members of a pro-Lyme association (“Lyme disease activists”)</b>                            | 3  | 2  |
| <b>Have requested and obtained a doctor’s prescription for a Lyme disease serological test</b> | 17 | 3  |
| <b>Referring physician’s position on the Lyme hypothesis</b>                                   |    | 4  |
| Pro-active                                                                                     | 5  | 5  |
| Neutral                                                                                        | 14 | 6  |
| Sceptical                                                                                      | 9  | 7  |
| Absent                                                                                         | 2  | 8  |
| <b>Patient’s diagnostic hypotheses ranking</b>                                                 |    | 9  |
| Lyme disease hypothesis rank 1 <sup>st</sup>                                                   | 24 | 10 |
| <b>The degree of certainty associated with the diagnoses among patients ranking</b>            |    | 11 |
| <b>Lyme hypothesis first</b>                                                                   |    | 12 |
| High degree of certainty                                                                       | 13 | 13 |
| Moderate-low degree of certainty                                                               | 11 | 14 |
|                                                                                                |    | 15 |

16

<sup>a</sup> False positive: Lyme serology was negative in ELISA and/or WesternBlot. The presence of IgM over a long period of time without serological evolution with the appearance of IgG was considered as a false positive and therefore concluded as negative.

17  
18  
19  
20

Table 4. Characteristic features of the diagnostic pathways for the 30 Participants

| <sup>22</sup><br><sup>23</sup> Characteristic features                                                                       | No. |
|------------------------------------------------------------------------------------------------------------------------------|-----|
| <sup>25</sup> Average no. of specialties used in relation to the history of symptoms (excluding infectiology and psychiatry) | 3.7 |
| Referral to > 5 medical specialists in relation to the history of symptoms (excluding infectiology and psychiatry)           | 10  |
| Referral to a psychiatrist in relation to the history of symptoms                                                            | 15  |
| Use of alternative medicine in relation to their symptoms                                                                    | 18  |
| Patients treated in a pain-treatment centre                                                                                  | 14  |
| Fibromyalgia: diagnosis evoked by a doctor                                                                                   | 23  |
| Refusal of “psychiatrisation of their symptoms”                                                                              | 21  |
| Main diagnostic pathway coordinator (typological approach)                                                                   |     |
| <i>Primary care physician</i>                                                                                                | 4   |
| <i>Referring physician (other specialties)</i>                                                                               | 3   |
| <i>Patient</i>                                                                                                               | 23  |
